# Supplementary material for: Association between circulating tumor cells and peripheral blood monocytes in metastatic breast cancer
Source: PubMed Central journal article supplement — Ther Adv Med Oncol. 2019 Aug 14;11:1758835919866065. doi: 10.1177/1758835919866065 (PMC6696837; doi:10.1177/1758835919866065), 2019-08-14
Supplement: Supplementary_Table_1.pdf [file Supplementary_Table_1.pdf]

**Supplementary Table 1.** Sensitivity, specificity, positive predictive value, negative predictive value, accuracy of overall survival at 24 months.

|                   | <b>% Sensitivity<br/>(95% CI)</b> | <b>% Specificity<br/>(95% CI)</b> | <b>% Positive Predictive Value<br/>(95% CI)</b> | <b>% Negative Predictive Value<br/>(95% CI)</b> | <b>% Accuracy<br/>(95% CI)</b> |
|-------------------|-----------------------------------|-----------------------------------|-------------------------------------------------|-------------------------------------------------|--------------------------------|
| NLR (cutoff 3)    | 53.6 (46.1-61.1)                  | 59.8 (50.0-69.6)                  | 69.8 (61.9-77.7)                                | 42.7 (34.4-51.0)                                | 55.8 (49.8-61.8)               |
| PLR (cutoff 210)  | 53.6 (46.1-61.1)                  | 62.9 (53.3-72.5)                  | 71.4 (63.5-79.3)                                | 43.9 (35.6-52.1)                                | 57.0 (51.0-63.0)               |
| MLR (cutoff 0.34) | 63.1 (55.8-70.4)                  | 53.6 (43.7-63.5)                  | 70.2 (62.9-77.5)                                | 45.6 (36.5-54.7)                                | 59.6 (53.7-65.5)               |
| SII (cutoff 836)  | 51.2 (43.6-58.8)                  | 61.9 (52.2-71.6)                  | 69.9 (61.8-78.0)                                | 42.3 (34.1-50.3)                                | 55.1 (49.1-61.1)               |
| CTC (cutoff 5)    | 51.8 (44.3-59.3)                  | 67.0 (57.6-76.4)                  | 73.1 (65.1-81.1)                                | 44.5 (36.4-52.6)                                | 57.4 (51.4-63.4)               |
