# Supplementary material for: Association between circulating tumor cells and peripheral blood monocytes in metastatic breast cancer
Source: PubMed Central journal article supplement — Ther Adv Med Oncol. 2019 Aug 14;11:1758835919866065. doi: 10.1177/1758835919866065 (PMC6696837; doi:10.1177/1758835919866065), 2019-08-14
Supplement: Supplementary_Table_2A_1.pdf [file Supplementary_Table_2A_1.pdf]

**Supplementary Table 2A.** First line chemotherapy. Univariate analysis of OS according to best cutoff value.

|            | No. pts | No. events | Median OS (months) (95% CI) | <i>p</i> | HR (95% CI)      | <i>p</i> |
|------------|---------|------------|-----------------------------|----------|------------------|----------|
| Overall    | 165     | 54         | 23.9 (20.5-36.3)            |          | -                |          |
| CTC < 5    | 95      | 22         | 36.3 (22.2-nr)              |          | 1.00             |          |
| ≥ 5        | 70      | 32         | 19.3 (13.1-26.6)            | 0.0008   | 2.47 (1.43-4.29) | 0.001    |
| NLR < 3    | 93      | 25         | 26.6 (22.2-40.1)            |          | 1.00             |          |
| ≥ 3        | 72      | 29         | 20.5 (16.2-36.3)            | 0.334    | 1.30 (0.76-2.23) | 0.336    |
| PLR < 210  | 95      | 26         | 26.6 (20.5-40.1)            |          | 1.00             |          |
| ≥ 210      | 70      | 28         | 23.5 (16.4-41.4)            | 0.496    | 1.20 (0.70-2.06) | 0.497    |
| SII < 836  | 89      | 25         | 27.7 (22.2-40.1)            |          | 1.00             |          |
| ≥ 836      | 76      | 29         | 21.6 (16.9-41.4)            | 0.756    | 1.09 (0.64-1.86) | 0.757    |
| MLR < 0.34 | 83      | 20         | 40.1 (23.1-45.4)            |          | 1.00             |          |
| ≥ 0.34     | 82      | 34         | 21.6 (15.0-27.7)            | 0.028    | 1.84 (1.06-3.20) | 0.031    |

nr, not reached.
