# Supplementary material for: Association between circulating tumor cells and peripheral blood monocytes in metastatic breast cancer
Source: PubMed Central journal article supplement — Ther Adv Med Oncol. 2019 Aug 14;11:1758835919866065. doi: 10.1177/1758835919866065 (PMC6696837; doi:10.1177/1758835919866065), 2019-08-14
Supplement: Supplementary_Table_2B_1.pdf [file Supplementary_Table_2B_1.pdf]

**Supplementary Table 2B.** All first-line treatments. Univariate analysis of OS according to best cutoff value.

|            | No. pts | No. events | Median OS (months) (95% CI) | <i>p</i> | HR (95% CI)      | <i>p</i> |
|------------|---------|------------|-----------------------------|----------|------------------|----------|
| Overall    | 240     | 71         | 30.4 (23.9-41.4)            | -        | -                | -        |
| CTC < 5    | 143     | 31         | 40.1 (30.4-nr)              |          | 1.00             |          |
| ≥ 5        | 97      | 40         | 23.1 (16.8-29.0)            | 0.0003   | 2.32 (1.44-3.71) | 0.0005   |
| NLR < 3    | 137     | 32         | 30.4 (27.2-45.4)            |          | 1.00             |          |
| ≥ 3        | 103     | 39         | 23.5 (18.3-41.4)            | 0.131    | 1.43 (0.90-2.29) | 0.133    |
| PLR < 210  | 143     | 32         | 36.3 (27.2-45.4)            |          | 1.00             |          |
| ≥ 210      | 97      | 39         | 23.5 (16.9-41.4)            | 0.042    | 1.62 (1.01-2.59) | 0.044    |
| SII < 836  | 132     | 32         | 34.5 (26.6-45.4)            |          | 1.00             |          |
| ≥ 836      | 108     | 39         | 27.2 (19.8-nr)              | 0.361    | 1.24 (0.78-1.99) | 0.362    |
| MLR < 0.34 | 128     | 30         | 40.1 (27.2-nr)              |          | 1.00             |          |
| ≥ 0.34     | 112     | 41         | 22.2 (19.3-36.3)            | 0.020    | 1.73 (1.08-2.78) | 0.022    |

nr, not reached.
