# Supplementary material for: Association between circulating tumor cells and peripheral blood monocytes in metastatic breast cancer
Source: PubMed Central journal article supplement — Ther Adv Med Oncol. 2019 Aug 14;11:1758835919866065. doi: 10.1177/1758835919866065 (PMC6696837; doi:10.1177/1758835919866065), 2019-08-14
Supplement: Supplementary_Table_2C_1.pdf [file Supplementary_Table_2C_1.pdf]

**Supplementary Table 2C.** All comers of therapy. Univariate analysis of OS according to best cutoff value.

|            | No. pts | No. events | Median OS (months) (95% CI) | <i>p</i> | HR (95% CI)      | <i>p</i> |
|------------|---------|------------|-----------------------------|----------|------------------|----------|
| Overall    | 276     | 116        | 20.1 (17.8-24.4)            |          | -                |          |
| CTC < 5    | 167     | 62         | 24.1 (19.4-34.0)            |          | 1.00             |          |
| ≥ 5        | 109     | 54         | 17.3 (11.1-21.7)            | 0.007    | 1.64 (1.14-2.37) | 0.008    |
| NLR < 3    | 149     | 59         | 23.5 (19.4-34.0)            |          | 1.00             |          |
| ≥ 3        | 127     | 57         | 17.3 (11.0-24.4)            | 0.018    | 1.55 (1.07-2.23) | 0.019    |
| PLR < 210  | 150     | 58         | 23.5 (18.5-nr)              |          | 1.00             |          |
| ≥ 210      | 126     | 58         | 18.8 (14.5-24.4)            | 0.112    | 1.34 (0.93-1.93) | 0.114    |
| SII < 836  | 168     | 63         | 23.8 (18.7-40.6)            |          | 1.00             |          |
| ≥ 836      | 108     | 53         | 17.3 (13.1-23.0)            | 0.021    | 1.53 (1.06-2.21) | 0.022    |
| MLR < 0.34 | 125     | 44         | 23.8 (19.7-40.6)            |          | 1.00             |          |
| ≥ 0.34     | 151     | 72         | 15.9 (11.6-23.0)            | 0.008    | 1.65 (1.13-2.41) | 0.009    |

nr, not reached.
